# Supplementary material for: Oriented Deep Eutectic Solvents as Efficient Approach for Selective Extraction of Bioactive Saponins from Husks of Xanthoceras sorbifolia Bunge
Source: MDPI journal article supplement (doi:10.3390/antiox11040736), 2022-04-08
Supplement: s1 [file s1]

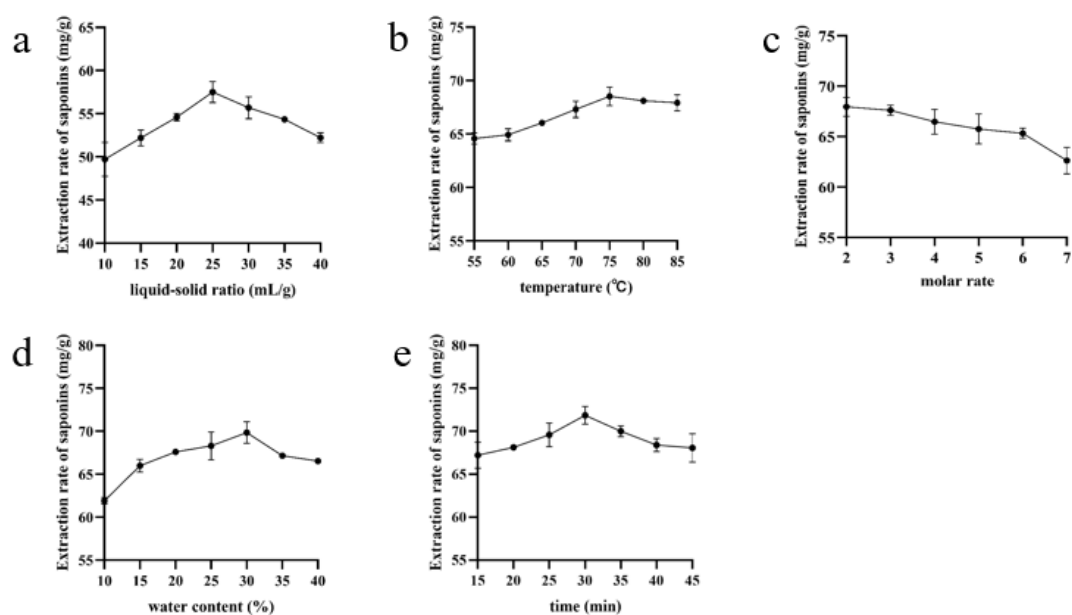

**Figure S1.** Five independent variables were determined for the preliminary range by single factor experiment. The range of variables and parameters is as follows: liquid-solid ratio (10, 15, 20, 25, 30, 35, and 40 mL/g), water content (10, 15, 20, 25, 30, 35, and 40 %), extraction temperature (55, 60, 65, 70, 75, 80, and 85 °C), extraction time (15, 20, 25, 30, 35, 40, and 45 min), and molar rate (1:2, 1:3, 1:4, 1:5, 1:6, 1:7) were determined for the preliminary range.

**Table S1.** The experimental orders, levels of variables, and response values in Box-Behnken design.

| Run | Extraction Time<br>(A, min) | Extraction<br>Temperature<br>(B, °C) | Liquid-Solid<br>Ratio<br>(C, mL/g) | Water Content<br>(D, %) | Total Extraction<br>Yields of<br>Saponins (mg<br>Re/g dw) |
|-----|-----------------------------|--------------------------------------|------------------------------------|-------------------------|-----------------------------------------------------------|
| 1   | 30                          | 75                                   | 20                                 | 40                      | 64.66±0.76                                                |
| 2   | 30                          | 75                                   | 25                                 | 35                      | 68.84±1.05                                                |
| 3   | 30                          | 75                                   | 30                                 | 40                      | 67.23±1.89                                                |
| 4   | 30                          | 75                                   | 25                                 | 35                      | 72.84±1.35                                                |
| 5   | 25                          | 70                                   | 25                                 | 35                      | 63.15±0.24                                                |
| 6   | 30                          | 75                                   | 20                                 | 30                      | 66.97±1.76                                                |
| 7   | 35                          | 70                                   | 25                                 | 35                      | 64.04±1.74                                                |
| 8   | 25                          | 80                                   | 25                                 | 35                      | 70.00±1.03                                                |
| 9   | 35                          | 80                                   | 25                                 | 35                      | 69.73±1.70                                                |

|    |    |    |    |    |            |
|----|----|----|----|----|------------|
| 10 | 30 | 75 | 30 | 30 | 68.72±2.01 |
| 11 | 30 | 80 | 30 | 35 | 70.43±3.20 |
| 12 | 25 | 75 | 25 | 30 | 70.80±1.05 |
| 13 | 35 | 75 | 25 | 40 | 68.66±1.64 |
| 14 | 30 | 75 | 25 | 35 | 72.85±0.85 |
| 15 | 30 | 70 | 20 | 35 | 64.05±0.99 |
| 16 | 30 | 75 | 25 | 35 | 70.53±1.67 |
| 17 | 25 | 75 | 25 | 40 | 62.79±1.41 |
| 18 | 30 | 70 | 30 | 35 | 65.63±1.53 |
| 19 | 35 | 75 | 25 | 30 | 69.82±1.83 |
| 20 | 30 | 80 | 20 | 35 | 70.03±0.12 |
| 21 | 30 | 75 | 25 | 35 | 72.81±1.10 |
| 22 | 25 | 75 | 30 | 35 | 71.57±0.96 |
| 23 | 35 | 75 | 30 | 35 | 69.58±2.53 |
| 24 | 30 | 70 | 25 | 30 | 64.69±1.35 |
| 25 | 25 | 75 | 20 | 35 | 71.40±2.08 |
| 26 | 30 | 80 | 25 | 40 | 66.30±0.21 |
| 27 | 30 | 75 | 25 | 35 | 72.80±1.11 |
| 28 | 30 | 70 | 25 | 40 | 64.21±1.35 |
| 29 | 30 | 80 | 25 | 30 | 67.01±2.03 |
| 30 | 35 | 75 | 20 | 35 | 66.11±0.22 |

**Table S2.** Characterization of chemical compounds in TPMBR-La extracts from *X. sorbifolia* shells powder by HPLC-ESI-MS in positive mode.

| No. | Rt<br>(min) | Molecular | Measured           | Measured            | MS/MS<br>(m/z)               | Molecular                                        | Proposed compound                                                                                                                                                         |
|-----|-------------|-----------|--------------------|---------------------|------------------------------|--------------------------------------------------|---------------------------------------------------------------------------------------------------------------------------------------------------------------------------|
|     |             | weight    | mass(m/z)          | mass(m/z)           |                              |                                                  |                                                                                                                                                                           |
|     |             | (Da)      | [M+H] <sup>+</sup> | [M+Na] <sup>+</sup> |                              | formula                                          |                                                                                                                                                                           |
|     |             |           |                    |                     |                              |                                                  |                                                                                                                                                                           |
| 1   | 25.21       | 678       | 679.50             | 701.50              | 495.21                       | C <sub>38</sub> H <sub>62</sub> O <sub>10</sub>  | 16-O-acetyl-21-O- $\alpha$ -L-rhamnopyranosyl- $\beta$ -barringtonenol C                                                                                                  |
| 2   | 32.63       | 944       | 945.55             | 967.53              | 821.76                       | C <sub>48</sub> H <sub>80</sub> O <sub>18</sub>  | 3-O- $\beta$ -D-glucopyranosyl,28-O-[ $\alpha$ -L-rhamnosyl(1→2)]- $\beta$ -D-glucopyranosyl-16-deoxybarringtonenol C                                                     |
|     |             |           |                    |                     | 1211.63                      |                                                  | 3-O-[ $\beta$ -D-glucopyranosyl (1→6)] (3'-O-angeloyl)- $\beta$ -D-glucopyranosyl-28-O-[ $\alpha$ -L-rhamnosyl (1→2)]- $\beta$ -D-glucopyranosyl-16-deoxybarringtonenol C |
| 3   | 37.34       | 1188      | 1189.65            | 1211.65             | 787.28<br>447.91             | C <sub>59</sub> H <sub>96</sub> O <sub>24</sub>  | 3-O-(3-O-angeloyl-4-O-acetyl-6-O- $\beta$ -D-glucopyranosyl)- $\beta$ -D-glucopyranosyl- 28-O-(2- $\alpha$ -L-rhamnopyranosyl-6-O- $\beta$ -                              |
| 4   | 38.21       | 1392      | 1393.69            | 1415.69             | 1415. 69<br>948.34<br>331.34 | C <sub>67</sub> H <sub>108</sub> O <sub>30</sub> |                                                                                                                                                                           |

|   |       |      |         |         |        |                                                 |                                                                                  |
|---|-------|------|---------|---------|--------|-------------------------------------------------|----------------------------------------------------------------------------------|
|   |       |      |         |         |        |                                                 | Dglucopyranosyl)- $\beta$ -D-glucopyranosyl-16-deoxybarringtonol C               |
|   |       |      |         |         | 695.85 |                                                 | 3- <i>O</i> -[ $\beta$ -D-galactopyranosyl-(1 $\rightarrow$ 2)]- $\alpha$ -L-    |
|   |       |      |         |         | 595.27 |                                                 | arabinofuranosyl-(1 $\rightarrow$ 3)- $\beta$ -D-                                |
| 5 | 50.90 | 1142 | 1143.58 | 1165.58 | 493.89 | C <sub>57</sub> H <sub>90</sub> O <sub>23</sub> | glucuronopyranosyl-21- <i>O</i> -angeloyl-28- <i>O</i> -2-                       |
|   |       |      |         |         | 342.93 |                                                 | methylbutanoyl-3 $\beta$ ,15 $\alpha$ ,16 $\alpha$ ,21 $\beta$ ,22 $\alpha$ ,28- |
|   |       |      |         |         |        |                                                 | hexahydroxyolean-12-ene (xanifolia Y7)                                           |
|   |       |      |         |         | 693.84 |                                                 | 3- <i>O</i> -( $\alpha$ -L-arabinofuranosyl(1 $\rightarrow$ 3)- $\beta$ -D-      |
| 6 | 54.20 | 1140 | 1141.57 | 1163.57 | 593.28 | C <sub>57</sub> H <sub>88</sub> O <sub>23</sub> | galactopyranosyl (1 $\rightarrow$ 2)) $\beta$ -D-                                |
|   |       |      |         |         | 493.89 |                                                 | glucuronopyranosyl-21,22-diangeloyl-R1-                                          |
|   |       |      |         |         | 342.93 |                                                 | barrigenol (xanthoceracide)                                                      |
|   |       |      |         |         | 709.87 |                                                 | 3- <i>O</i> -[ $\beta$ -D-glucopyranosyl-(1 $\rightarrow$ 2)]- $\alpha$ -L-      |
|   |       |      |         |         | 509.87 |                                                 | arabinofuranosyl (1 $\rightarrow$ 3)- $\beta$ -D-                                |
| 7 | 55.26 | 1156 | 1157.57 | 1179.57 | 493.89 | C <sub>57</sub> H <sub>88</sub> O <sub>24</sub> | glucuronopyranosyl-21,22- <i>O</i> -diangeloyl-                                  |
|   |       |      |         |         | 342.93 |                                                 | 3 $\beta$ ,15 $\alpha$ ,16 $\alpha$ ,21 $\beta$ ,22 $\alpha$ ,24 $\beta$ ,28-    |
|   |       |      |         |         |        |                                                 | heptahydroxyolean-12-ene (xanifolia Y2)                                          |
